# Supplementary material for: Exhausted-like CD8+ T cell phenotypes linked to C-peptide preservation in alefacept-treated T1D subjects
Source: JCI journal article supplement (doi:10.1172/jci.insight.142680), 2020-12-22
Supplement: sd1 [file 1]

**Supplementary Materials: Exhausted-like CD8 T cell phenotypes linked to C-peptide preservation in alefacept-treated T1D subjects**

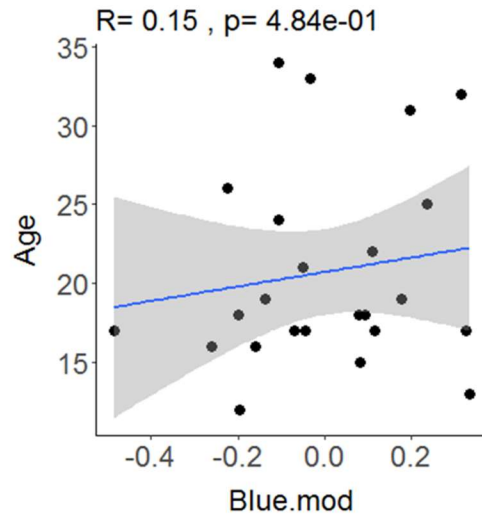

**Figure S1. Blue module gene expression was not correlated with age.**

Pearson correlation between subject age and blue module eigengene expression at week 104. P-value from linear model: eigengene ~ age; statistic summarized by 1- way ANOVA.

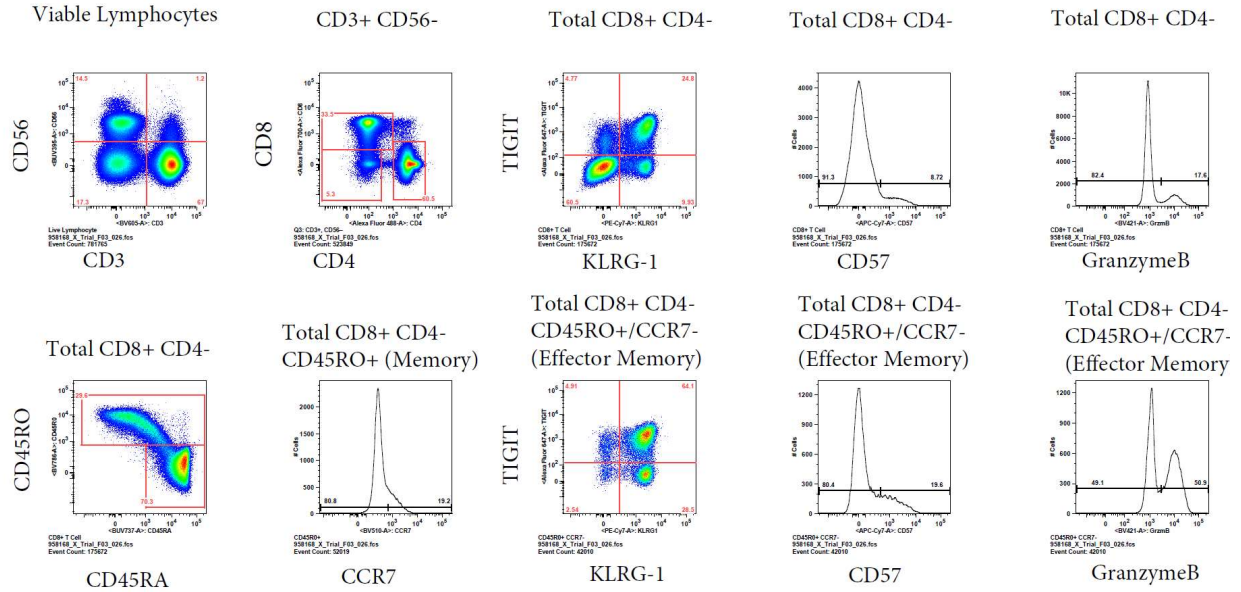

**Figure S2. Representative gating of CD8 T cells (top) and memory CD8 T cell subpopulations shown in Figure 2 (bottom).** CD8 gate excluded CD4<sup>+</sup> and CD56<sup>+</sup> cells. Representative gates and population histograms from a single subject are shown for DP (KLRG1<sup>+</sup>TIGIT<sup>+</sup>), CD57<sup>+</sup>, and Granzyme B<sup>+</sup> TEM populations.

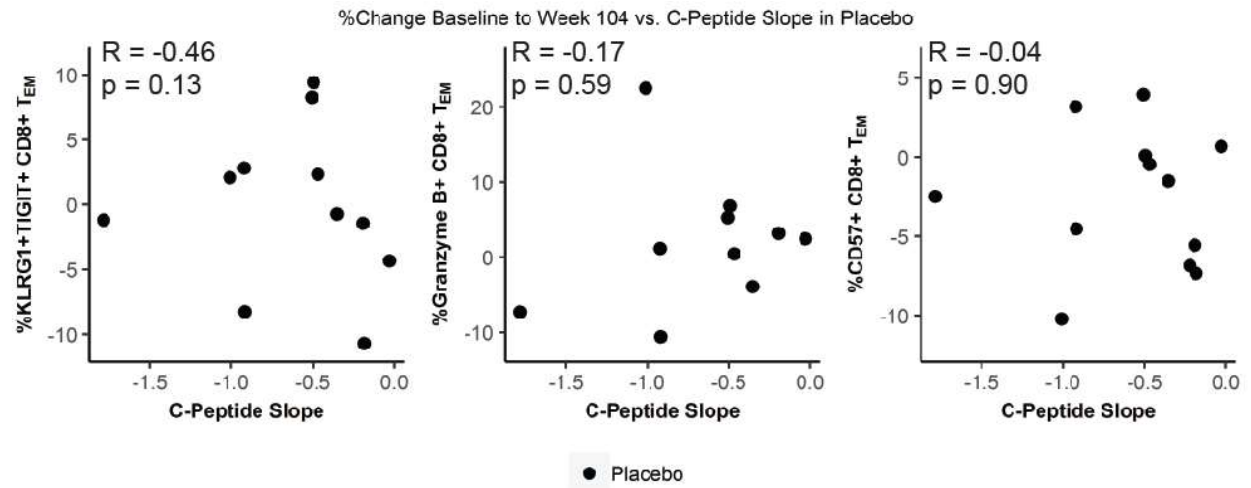

**Figure S3. Placebo correlations between TEM subsets and c-peptide change (slope) at week 104.** Spearman correlation and correlation p-value are shown.

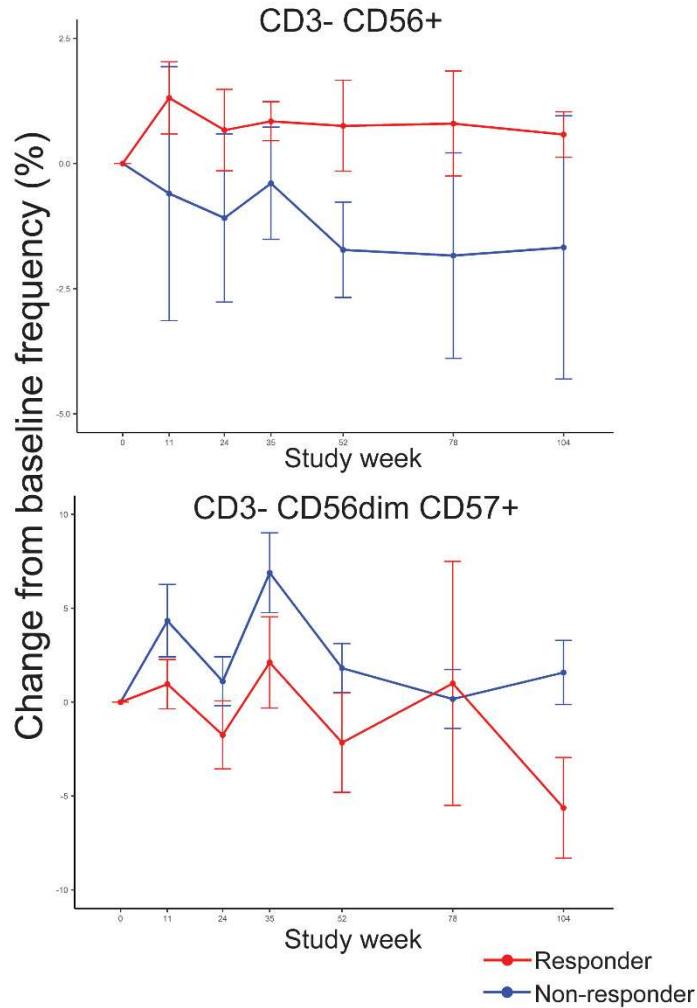

**Figure S4. NK cell frequencies did not vary by response over the course of the trial.** Change in subset frequency of parent population, shown for NK cells (CD3- CD56+; % of lymphocytes) and CD57+ NK cells (CD3- CD56dim CD57+; % of CD56+) from flow cytometry analysis, gated and analyzed as in Figure 2. Repeated measures 1-way ANOVA was used for significance calculations. No significant differences existed between responders and non-responders. P-values < 0.05 were considered significant.

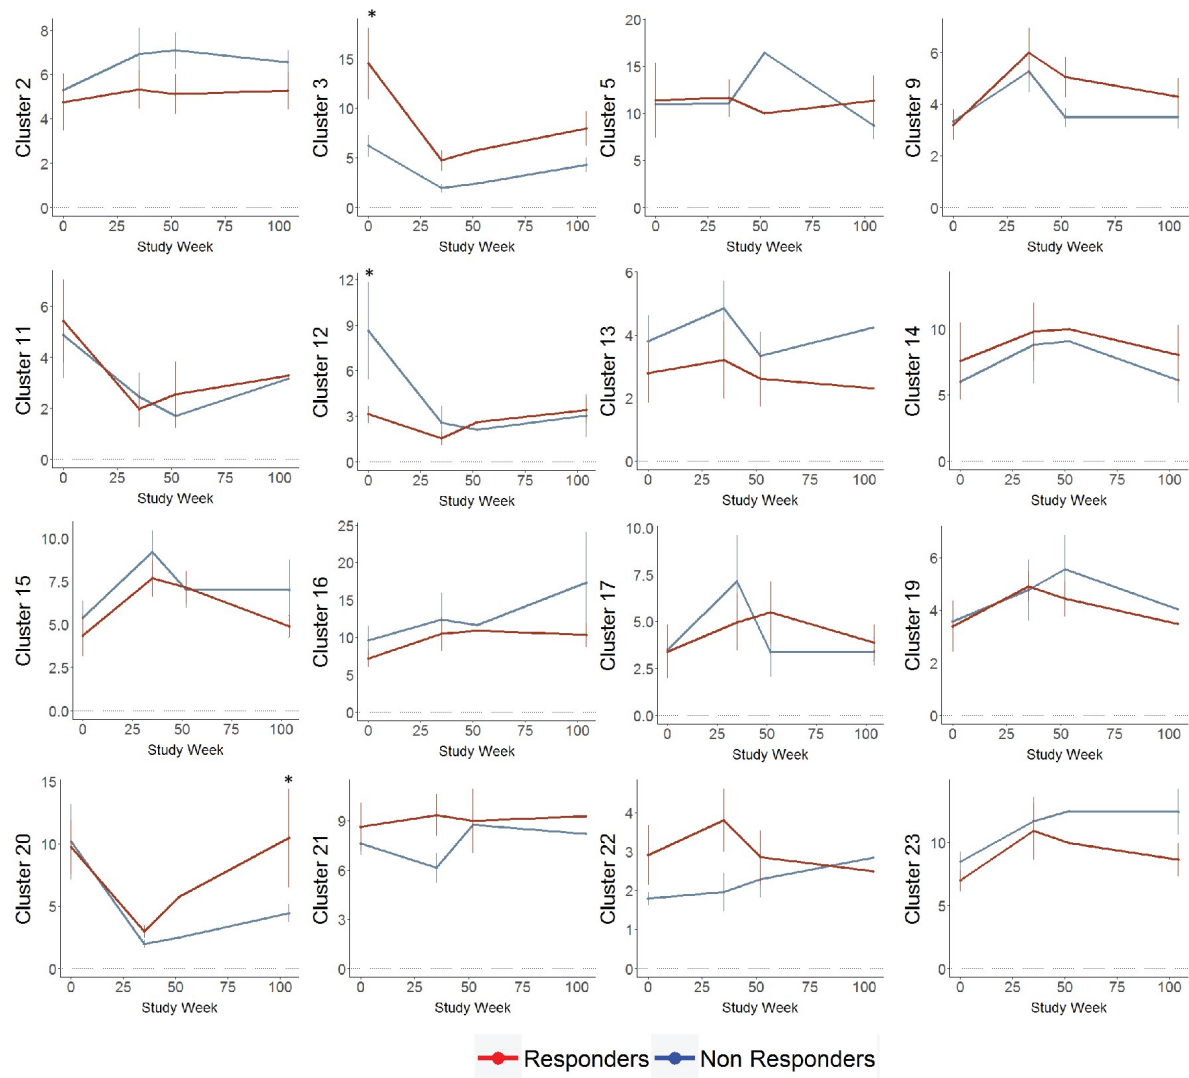

**Figure S5. CyTOF clusters change in frequency over time by response group.** Cluster frequency for all clusters containing >1% of total cells. Significance of response differences tested by repeated-measures 1-way ANOVA; n=12; p-values < 0.05 were considered significant.

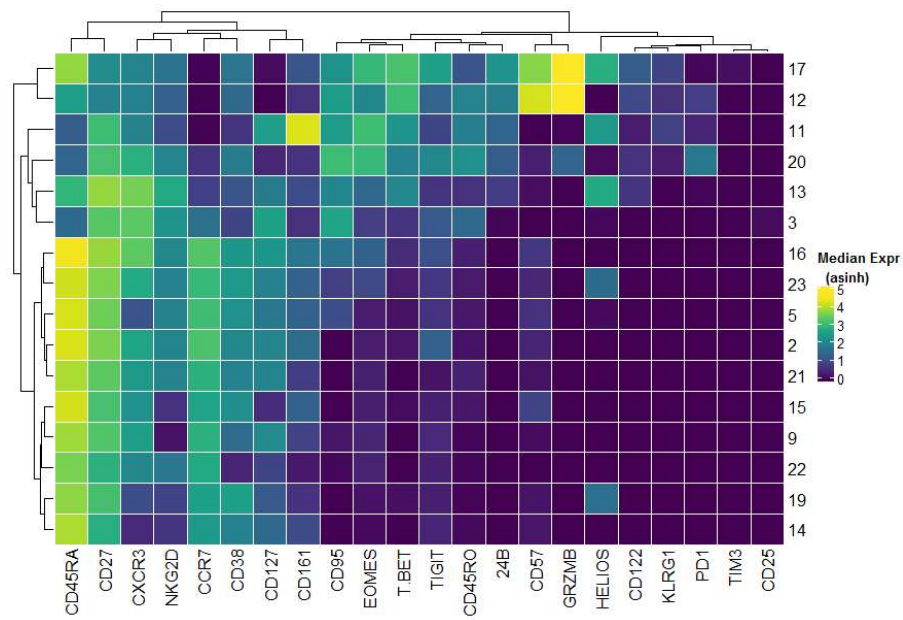

**Figure S6. Median marker expression of CyTOF clusters.** Median intensity values were transformed to an arcsinh scale with cofactor 15, and median expression was calculated across subjects.

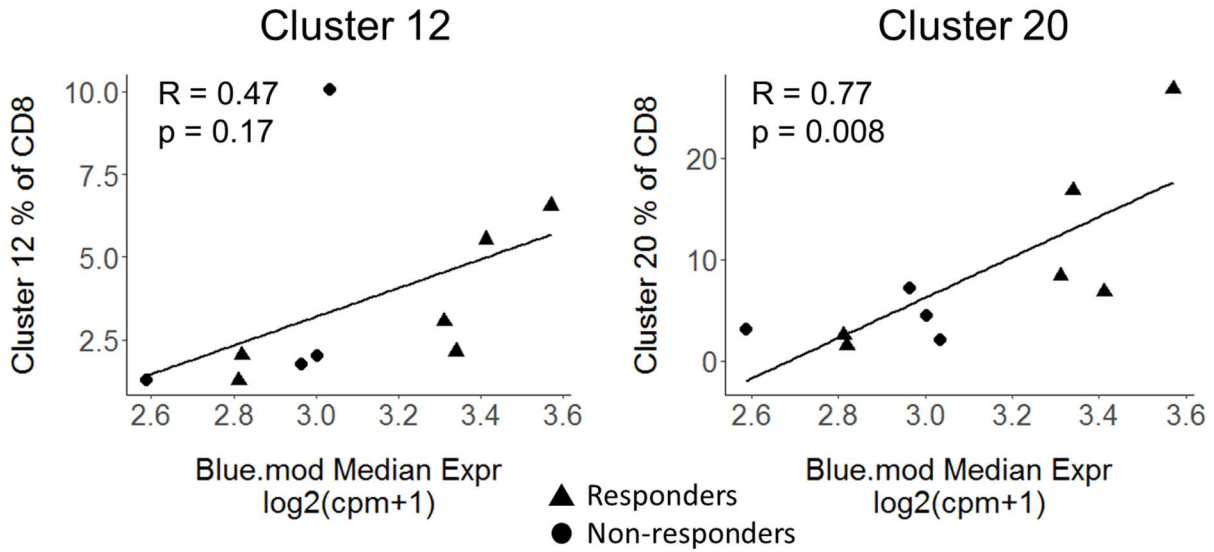

**Figure S7. Cluster 12 and 20 frequencies were correlated with blue module gene expression at week 104.** Percentage of cells in Cluster 12 and Cluster 20 plotted against median blue module gene expression at week 104. Pearson correlation and the corresponding 2-tailed t test were performed using cor.test function in R.

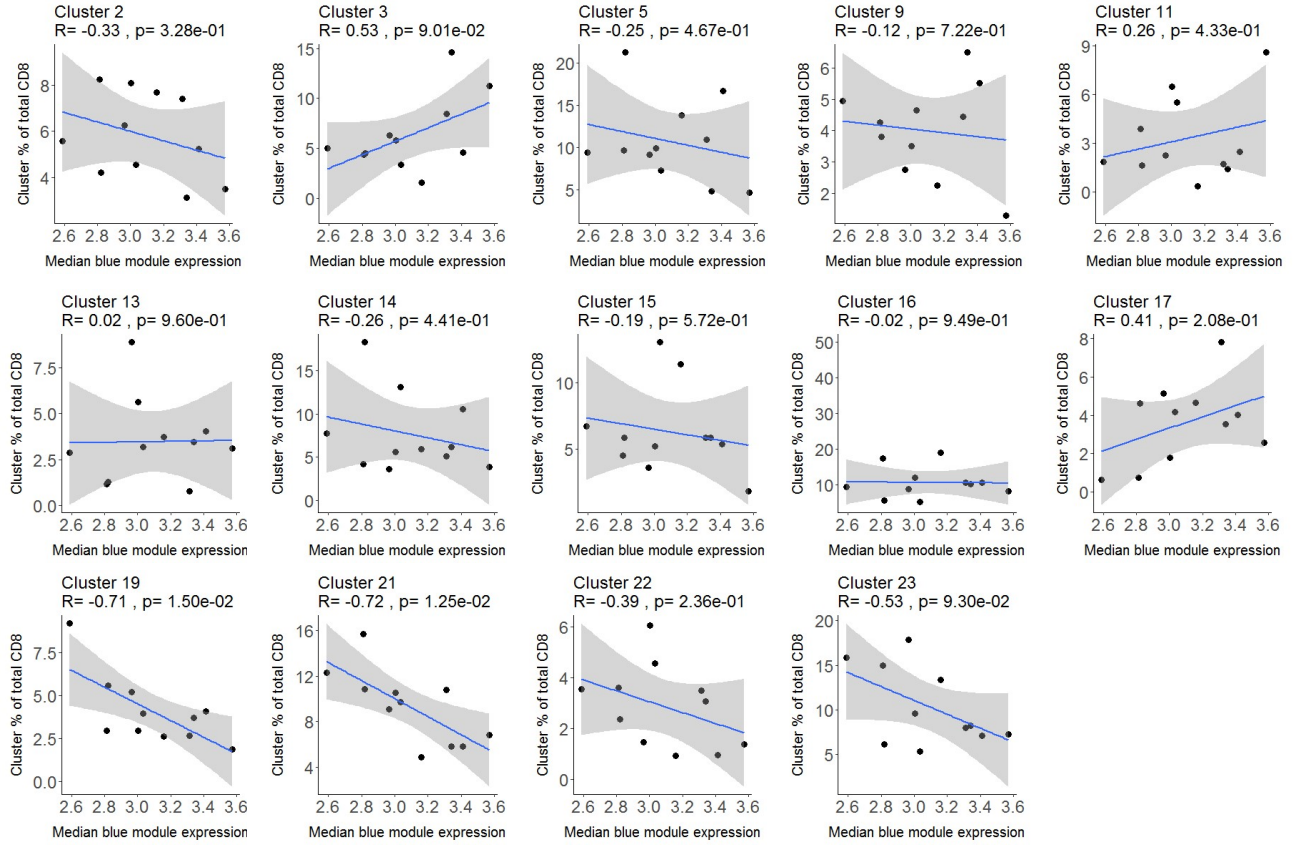

**Figure S8. Cluster frequency correlations with median blue module expression at week 104.**

Median blue module gene expression was calculated and correlated with each cluster's % of total CD8 for week 104 samples. Pearson correlation and the corresponding 2-tailed t test were performed using cor.test function in R.



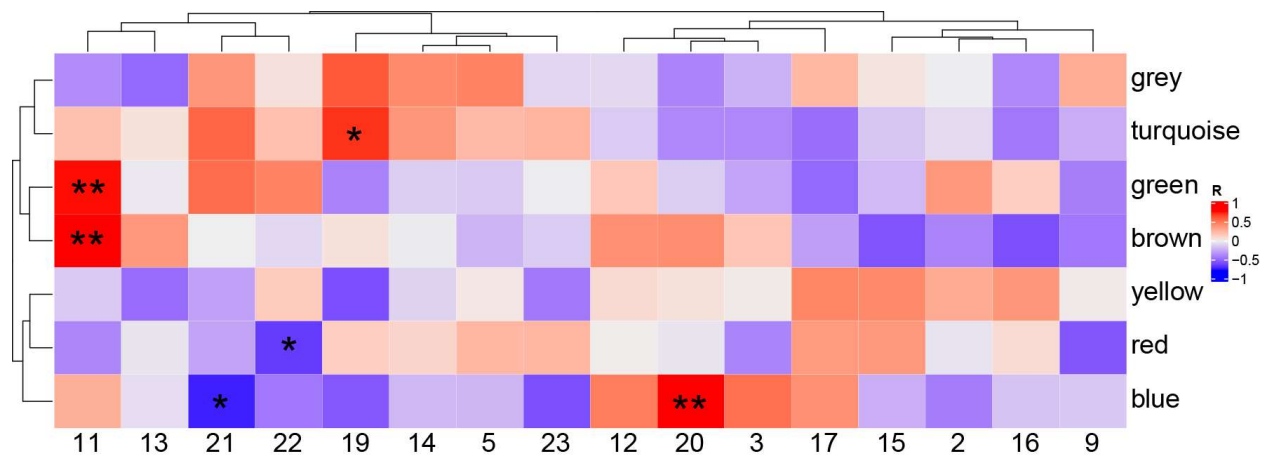

**Figure S9. Cluster correlations with median module gene expression.** Pearson correlation was calculated between week 104 cluster % of total CD8 and median expression of module genes ( $\log_2(\text{cpm}+1)$ ). Correlations that were significantly different from zero as determined by a two-sided t-test are labeled with asterisks (\*  $< 0.05$ ; \*\*  $< 0.01$ ).

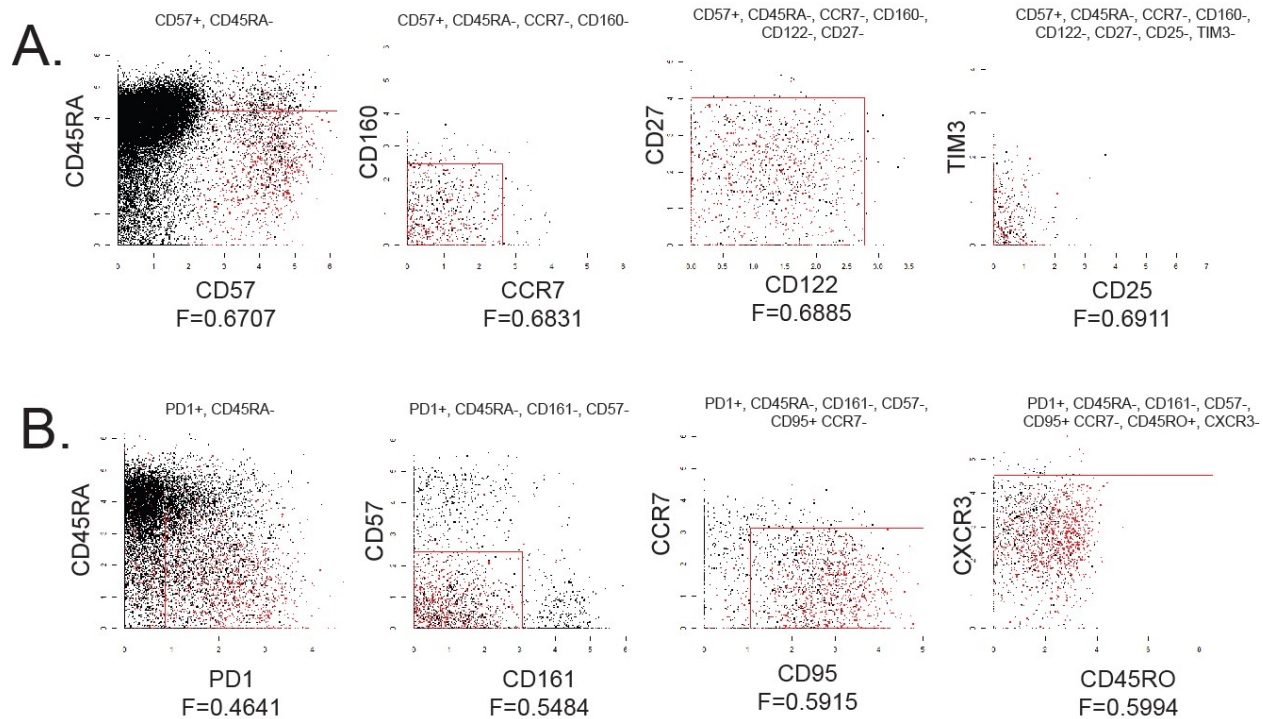

**Figure S10. Hypergate analysis for sorting marker selection.** A) Hypergate's suggested gating scheme for cluster 12 and B) for cluster 20. F score indicates predicted population purity for each cumulative set of gates.

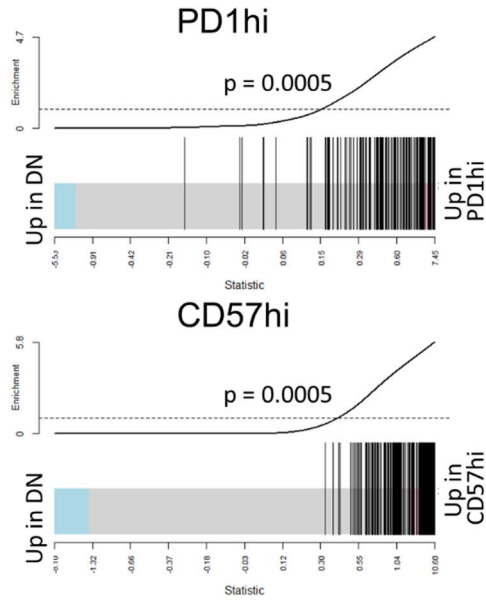

**Figure S11. Clusters 12 and 20 were enriched for DP genes relative to DN population.** DP genes were defined by contrasting sorted TIGIT+KLRG1+ (DP) and double negative cells by differential gene expression analysis and selecting genes that were significantly upregulated in DP relative to DN cells (adjusted  $p < 0.05$ ). Full gene list are provided in supplementary file. Analysis was performed in R with the barcodeplot function for visualization and the non-competitive rotation gene set test *roast* for enrichment p-values.

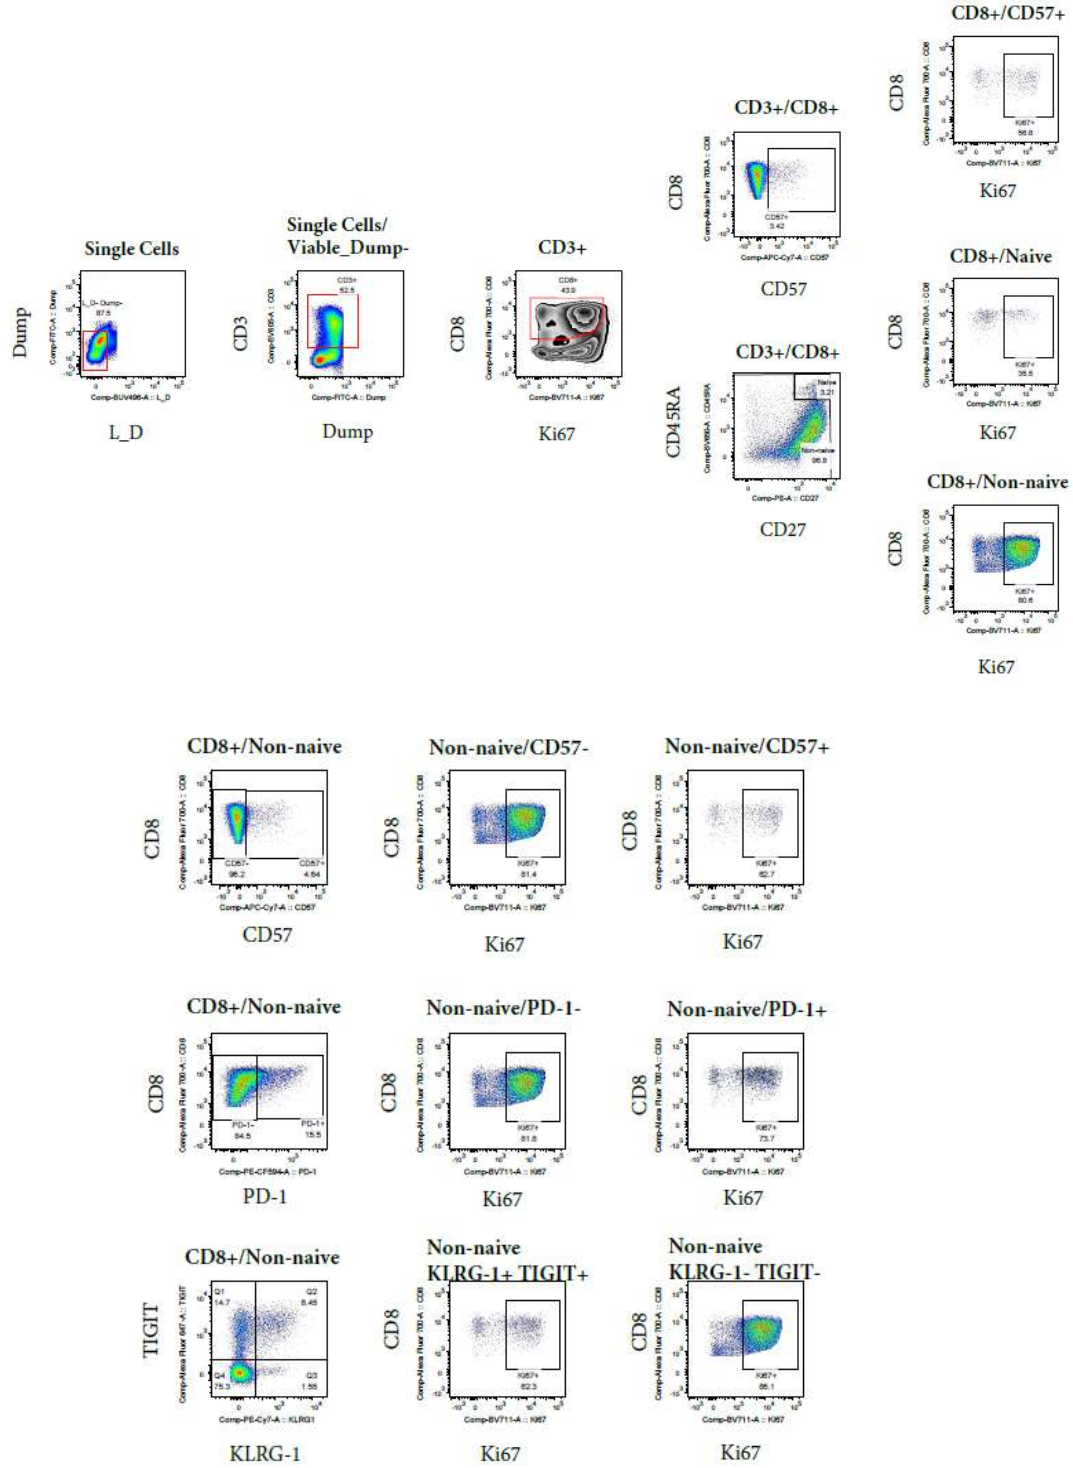

Figure S12. Representative gating of PD-1+, CD57+ and KLRG1+TIGIT+ non naïve (CD45RA-) CD8 T cells subsets (top) and Ki67 expression shown in Figure 4D (Bottom graphs).

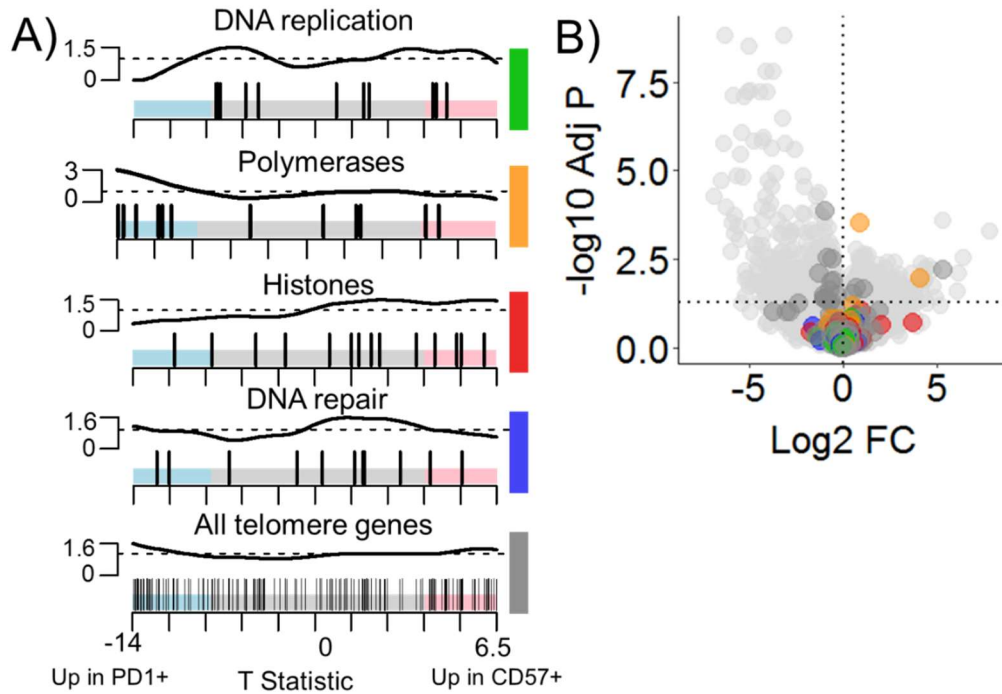

**Figure S13. CD57+ cells were not enriched for telomere and DNA maintenance genes relative to PD-1+ cells.** CD57+ cells and PD1+ cells were contrasted using limma for DGEA as in Figure 5. **A)** A set of genes related to replicative senescence was defined as the intersection between the GO\_TELOMERE\_ORGANIZATION gene set from the Molecular Signatures Database (MSigDB) and REACTOME database pathways. The overlapping gene set (n=175) included DNA replication (RPA1, RIF1, etc), polymerases (POLD1, PARP1, etc), histones (HIST1H3A, HIST1H4A, etc.), and DNA repair (ATM, XRCC1, etc). Gene subsets were analyzed by non-competitive gene enrichment analysis *roast* in R and visualized with the barcodeplot function in the limma package. Only the subset of polymerase genes showed significant enrichment ( $P < 0.05$ ), with increased enrichment in PD1+ cells relative to CD57+ cells ( $p = 0.01$ ). **B)** Volcano plot shows differential expression of telomere-related genes color coded by the gene sets defined in (A).

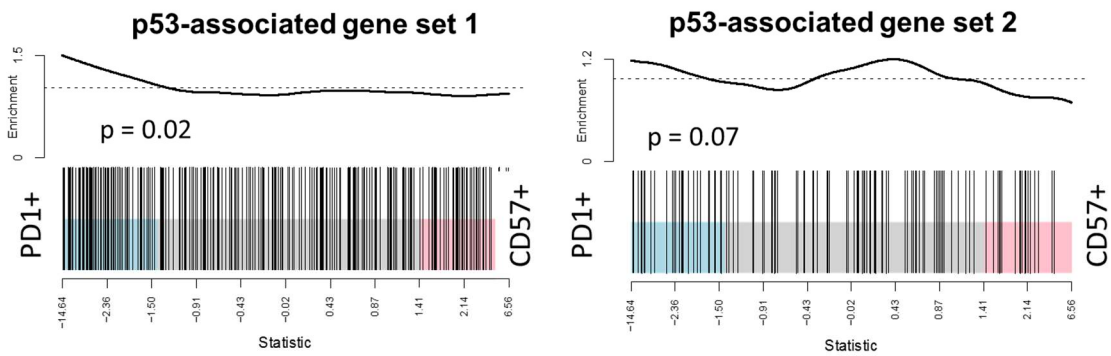

**Figure S14. CD57+ cells were not enriched for p53-associated genes.** CD57+ population was contrasted with PD1+ population using roast and barcodeplot in R to determine if CD57+ cells were enriched for senescence related genes. The gene sets tested included genes found to be targeted by or associated with p53 in previous studies. Gene set 1 (left): 346 p53 target genes identified across 319 studies by Fischer, *Oncogene* 2017. Gene set 2 (right): 116 top genes identified in at least 6 of 16 studies by Fischer, *Oncogene* 2017.

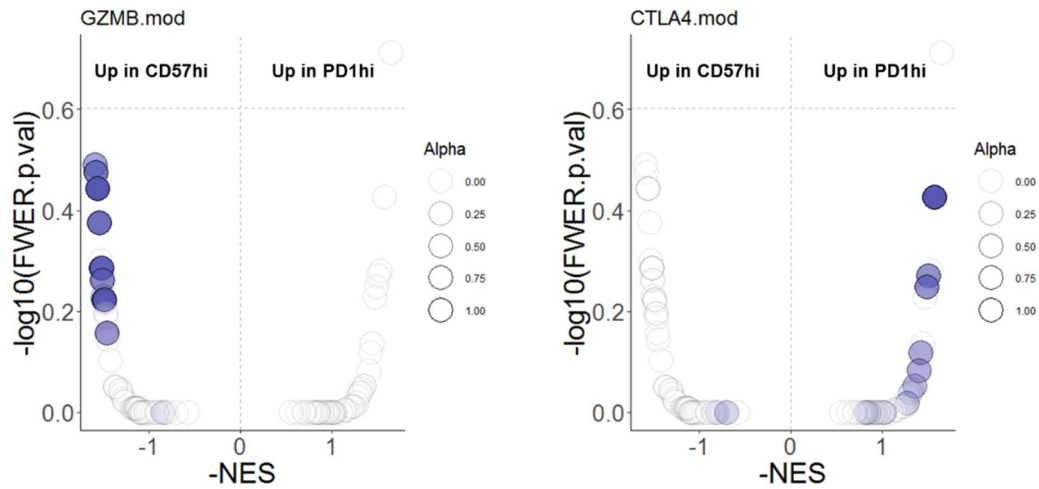

**Figure S15. Gene sets related to cytotoxicity were enriched in CD57hi cells, while inhibitory-related modules were enriched in PD1hi cells.** GSEA was run contrasting sorted CD57hi and PD1hi populations, using the 111 modules defined by Linsley, et al.. Nominal enrichment score of each module is plotted against its adjusted p-value, with CD57hi cells on the left and PD1hi on the right. The alpha color of each point indicates its overlap with the specific module (GZMB.mod and CTLA4.mod, respectively). Modules with high gene overlap are assumed to be functionally related, and similar enrichment of overlapping modules provides internal validation of functional enrichment.

---

**Supplementary Table 1. Post-QC RNA-seq Sample Numbers**

---

| <b>Week</b> | <b>Responder</b> | <b>Partial<br/>Responder</b> | <b>Non-<br/>responder</b> |
|-------------|------------------|------------------------------|---------------------------|
| <b>0</b>    | 6                | 10                           | 8                         |
| <b>24</b>   | 6                | 9                            | 8                         |
| <b>35</b>   | 6                | 10                           | 8                         |
| <b>52</b>   | 6                | 7                            | 8                         |
| <b>104</b>  | 7                | 7                            | 8                         |

---

**Table S1. Number of RNA-seq samples per response group and visit remaining after excluding low quality libraries. See Materials and Methods for exclusion criteria.**



**Supplementary Table 2. TCR junctions identified in sorted populations.**

| Lib.ID   | Donor | Week | Cell.Type | Junction          |
|----------|-------|------|-----------|-------------------|
| lib36283 | 10213 | 52   | CD57+     | CASSSEATNEKLFF    |
| lib36283 | 10213 | 52   | CD57+     | CVVSDGGNTPLVF     |
| lib36283 | 10213 | 52   | CD57+     | CASSLGFGSYEQYF    |
| lib36283 | 10213 | 52   | CD57+     | CILRDDNAGNMLTF    |
| lib36285 | 10213 | 52   | PD1+      | CVVSDGGNTPLVF     |
| lib36285 | 10213 | 52   | PD1+      | CASSLGFGSYEQYF    |
| lib36285 | 10213 | 52   | PD1+      | CASSSEATNEKLFF    |
| lib36285 | 10213 | 52   | PD1+      | CILRDDNAGNMLTF    |
| lib36289 | 10458 | 52   | CD57+     | CSARNKEEGLANYGYTF |
| lib36295 | 10458 | 104  | CD57+     | CILPLAGGTSYGKLTF  |
| lib36295 | 10458 | 104  | CD57+     | CSARNKEEGLANYGYTF |
| lib36295 | 10458 | 104  | CD57+     | CASSLGQAYEQYF     |
| lib36295 | 10458 | 104  | CD57+     | CARTGRNTGELFF     |
| lib36297 | 10458 | 104  | PD1+      | CASSLGQAYEQYF     |
| lib36297 | 10458 | 104  | PD1+      | CILPLAGGTSYGKLTF  |
| lib36297 | 10458 | 104  | PD1+      | CARTGRNTGELFF     |

**Table S2. TCR junctions identified in sorted populations.** Sequence comparisons were performed by BLAST analysis against the NCBI (National Center for Biotechnology) non-redundant protein database.

| Target    | Format     | Clone    | Vendor   |
|-----------|------------|----------|----------|
| CD56      | BUV395     | NCAM16.2 | BD       |
| CCR7      | BV510      | G043H7   | BL       |
| CD4       | BB515      | RPA-T4   | BD       |
| CD3       | eV605      | OKT3     | eBio     |
| PD-1*     | eV655      | J105     | eBio     |
| TIGIT     | APC        | MBSA43   | eBio     |
| CD127 #   | BV711      | A019D5   | BL       |
| CD8       | Alexa700   | RPA-T8   | BL       |
| CD45RA    | BUV737     | HI100    | BD       |
| KLRG-1    | PE-Vio770  | REA261   | Miltenyi |
| CD57      | APC-Vio770 | TB03     | Miltenyi |
| CD45RO    | BV786      | UCHL1    | BD       |
| GranzymeB | BV421      | GB11     | BD       |
| Eomes     | PE         | WD1928   | eBio     |
| FOXP3     | PE-CF594   | 259D     | BD       |

**Table S3. Flow cytometry panel for immunophenotyping and intracellular staining.**

| Supplementary Table 4. Cell sorting panel |          |        |          |
|-------------------------------------------|----------|--------|----------|
| Target                                    | Format   | Clone  | Vendor   |
| CD56                                      | APC-Cy7  | HCD56  | BL       |
| CD19                                      | APC-Cy7  | HIB19  | BL       |
| CD14                                      | APC-Cy7  | M5E2   | BL       |
| CD8                                       | Alexa700 | SK1    | BL       |
| CD3                                       | BV605    | UCHT1  | BL       |
| PD-1                                      | PE-cf594 | EH12.1 | BD       |
| TIGIT                                     | APC      | MBSA43 | eBio     |
| KLRG-1                                    | PE-Cy7   | REA261 | Miltenyi |
| CD45RA                                    | BUV737   | HI100  | BD       |
| CD57                                      | BV421    | NK-1   | BD       |
| CD27                                      | PE       | M-T271 | BL       |

**Table S4. Flow cytometry panel used for cell sorting of various CD8 memory subsets (shown in figure 4).**

| Supplementary Table 5. Proliferation / ICS flow panel |              |           |          |
|-------------------------------------------------------|--------------|-----------|----------|
| Target                                                | Format       | Clone     | Vendor   |
| CD56                                                  | FITC         | NCAM16.2  | BD       |
| CD45RA                                                | BV421        | HI100     | BD       |
| CD8                                                   | Alexa700     | SK1       | BL       |
| CD3                                                   | BV605        | UCHT1     | BL       |
| PD-1                                                  | BUV737       | EH12.1    | BD       |
| TIGIT                                                 | APC          | MBSA43    | eBio     |
| KLRG-1                                                | PE-Vio770    | REA261    | Miltenyi |
| CD57                                                  | APC-Vio770   | REA769    | Miltenyi |
| CD107a                                                | PE-Dazzle594 | H4A3      | BL       |
| Ki67                                                  | BV711        | B56       | BD       |
| Eomes                                                 | PE           | WD1928    | eBio     |
| IL-2                                                  | BB700        | MQ1-17H12 | BD       |
| IFN- $\gamma$                                         | BUV395       | B27       | BD       |
| TNF $\alpha$                                          | BV650        | MAb11     | BL       |

**Table S5. Flow cytometry panel used in the proliferation assay (Ki67) and intracellular cytokine staining.**

| Mass    | Target                | Clone    | Supplier           | Cocktail      |
|---------|-----------------------|----------|--------------------|---------------|
| 89      | CD45                  | HI30     | Fluidigm           | Surface       |
| 141     | CD45RO                | UCHL1    | Biolegend*         | Surface       |
| 142     | CD57                  | HCD57    | Fluidigm           | Surface       |
| 143     | CD45RA                | HI100    | Fluidigm           | Surface       |
| 144     | CD38                  | HIT2     | Fluidigm           | Surface       |
| 145     | CD8                   | RPA-T8   | Biolegend*         | Surface       |
| 146     | CD4                   | RPA-T4   | Biolegend*         | Surface       |
| 147     | KLRG1                 | 14C2A07  | Biolegend*         | Surface       |
| 148     | CD14                  | RMO52    | Fluidigm           | Surface       |
| 149     | CD127                 | A019D5   | Fluidigm           | Surface       |
| 151     | Helios                | 22F6     | Biolegend*         | Intracellular |
| 152     | CD160                 | BY55     | Biolegend*         | Surface       |
| 153     | Tim3                  | F382E2   | Fluidigm           | Surface       |
| 154     | CD3                   | UCHT1    | Fluidigm           | Surface       |
| 155     | TIGIT                 | MBSA43   | eBioscience*       | Surface       |
| 156     | CD25                  | M-A251   | Biolegend*         | Surface       |
| 158     | CD27                  | L128     | Fluidigm           | Surface       |
| 159     | CD161                 | HP3G10   | Fluidigm           | Surface       |
| 160     | Tbet                  | 4B10     | Fluidigm           | Intracellular |
| 162     | Eomes                 | WD1928   | eBioscience*       | Intracellular |
| 163     | CXCR3                 | G025H7   | Fluidigm           | Surface       |
| 164     | CD95                  | DX2      | Fluidigm           | Surface       |
| 165     | CD19                  | HIB19    | Fluidigm           | Surface       |
| 166     | NKG2D                 | ON72     | Fluidigm           | Surface       |
| 167     | CCR7                  | G043H7   | Fluidigm           | Surface       |
| 170     | CD122                 | Tu27     | Fluidigm           | Surface       |
| 171     | Granzyme B            | GB11     | Fluidigm           | Intracellular |
| 173     | 2B4                   | C1.7     | Biolegend*         | Surface       |
| 175     | PD1                   | EH12.2H7 | Fluidigm           | Surface       |
| 176     | CD56                  | NCAM16.2 | Fluidigm           | Surface       |
| 191/193 | Iridium (cell size)   | --       | Fluidigm           | Iridium       |
| 194-198 | Cisplatin (viability) | --       | Enzo Life Sciences | Cisplatin     |

\*Unlabeled purified antibodies were conjugated to metal isotopes using Maxpar X8 Antibody Labeling Kits (Fluidigm) as per manufacturer's instructions.

**Table S6. CyTOF panel for immunophenotyping and intracellular staining.**
